# Supplementary material for: Component Adjustment of Poly(arylene ether nitrile) with Sulfonic and Carboxylic Groups for Dielectric Films
Source: MDPI journal article supplement (doi:10.3390/polym11071135), 2019-07-03
Supplement: s1 [file s1]

## **Supplementary Information**

### **Component Adjustment of Poly(arylene ether nitrile) with Sulfonic and Carboxylic Groups for Dielectric Films**

Chenchen Liu, Shuning Liu, Jian Lin, Lingling Wang, Yumin Huang\*, Xiaobo Liu\*

*Research Branch of Advanced Functional Materials, School of Materials and Energy,  
University of Electronic Science and Technology of China, Chengdu, 611731, P. R.  
China*

Email address: hym@uestc.edu.cn (Yumin Huang); liuxb@uestc.edu.cn (Xiaobo Liu).

Tel. /fax: +86-28-83207326.

## 1.Characterization

### 1.1 Ion exchange capacity (IEC)

The IEC of SCPEN films were determined by a typical acid-base titration. Films were dried in an oven at 100 °C for 6 h to obtain the weights in dry state and then soaked in 1 M NaCl solution for 24 h to substitute the H<sup>+</sup> ions with Na<sup>+</sup> ions. Then, the H<sup>+</sup> ions released into the solution were quantified using 0.01 M NaOH with phenolphthalein as the indicator. The IEC values were calculated using the equation below,

$$\text{IEC (mmol/g)} = \frac{V_{\text{NaOH}} \times C_{\text{NaOH}}}{W_{\text{dry}}} \quad (\text{S1})$$

where  $V_{\text{NaOH}}$  is the consumed volume in the titration,  $C_{\text{NaOH}}$  is the concentration of the titrant, and  $W_{\text{dry}}$  is the weight of SCPEN film.

### 1.2 Water uptake and swelling ratio

Prior to the measurements, all of SCPEN films were dried in an oven at 100 °C for 6 h to remove the moisture, and the weights of dry films were obtained, Then, the films were soaked in deionized water at 30 °C for 24 h. The water uptake (%) was calculated by measuring the weight changes of films before and after immersion in. Equation S2 was used to calculate the water uptake of the films.

$$\text{water uptake (\%)} = \frac{W_{\text{wet}} - W_{\text{dry}}}{W_{\text{dry}}} \times 100 \quad (\text{S2})$$

where the weights of the dry and wet films are separately represented by  $W_{\text{dry}}$  and  $W_{\text{wet}}$ .

The swelling ratio of films was obtained by measuring the changes in length, area and volume before and after immersion in water. Equations S3–S5 were used,

$$\text{Swelling in length } (S_L, \%) = \frac{L_{\text{wet}} - L_{\text{dry}}}{L_{\text{dry}}} \times 100 \quad (\text{S3})$$

where  $S_L$  is the swelling ratio in terms of the length (%), and the lengths of films in their wet and dry states are separately represented by  $L_{\text{wet}}$  and  $L_{\text{dry}}$ .

$$\text{Swelling in area } (S_A, \%) = \frac{A_{\text{wet}} - A_{\text{dry}}}{A_{\text{dry}}} \times 100 \quad (\text{S4})$$

where  $S_A$  is the swelling ratio in terms of the area (%) and the areas of films in their wet and dry states are separately represented by  $A_{\text{wet}}$  and  $A_{\text{dry}}$ .

$$\text{Swelling in volume } (S_V, \%) = \frac{V_{\text{wet}} - V_{\text{dry}}}{V_{\text{dry}}} \times 100 \quad (\text{S5})$$

where  $S_V$  is the swelling ratio in terms of the volume (%) and the volumes of films in their wet and dry states are separately represented by  $V_{\text{wet}}$  and  $V_{\text{dry}}$ .
